# Supplementary material for: A genetic analysis of a Spanish population with early onset Parkinson’s disease
Source: PubMed Central journal article supplement (PMC7462269; doi:10.1371/journal.pone.0238098), 2020-09-01
Supplement: pone.0238098.s002.pdf [file pone.0238098.s002.pdf]

**Table S1.** Summary of deleteriousness prediction methods used in our study.

| <b>Name</b>       | <b>Category</b>     | <b>Threshold</b>                            |
|-------------------|---------------------|---------------------------------------------|
| SIFT              | Function prediction | < 0.05                                      |
| Polyphen-2        | Function prediction | > 0.85                                      |
| Mutation Taster   | Function prediction | Disease causing o Disease causing automatic |
| PhyloP            | Conservation score  | > 0.7                                       |
| CADD              | Ensembl score       | > 10                                        |
| Grantham Score    | Conservation score  | > 100                                       |
| PhastCons         | Conservation score  | > 0.7                                       |
| GERP++            | Conservation score  | > 3                                         |
| LRT               | Function prediction | Deleterious                                 |
| Mutation Assessor | Function prediction | High o Medium                               |
| LR                | Ensembl score       | Deleterious                                 |
| FATHMM            | Function prediction | Deleterious                                 |
| RadialSVM         | Ensembl score       | Deleterious                                 |
| SSF               | Effect on splicing  | > 70                                        |
| MaxEnt            | Effect on splicing  | > 0                                         |
| NNSPLICE          | Effect on splicing  | > 0.4                                       |
| GeneSplicer       | Effect on splicing  | > 0                                         |
| HSF               | Effect on splicing  | > 65                                        |
| dbscSNV_RF_Score  | Effect on splicing  | > 0.6                                       |
| dbscSNV_Ada_Score | Effect on splicing  | > 0.6                                       |
