# Supplementary material for: A genetic analysis of a Spanish population with early onset Parkinson’s disease
Source: PubMed Central journal article supplement (PMC7462269; doi:10.1371/journal.pone.0238098), 2020-09-01
Supplement: pone.0238098.s003.pdf [file pone.0238098.s003.pdf]

**Table S2. Description of 32 preselected candidate pathogenic variants after applying bioinformatics filters.** Nonsense variants and those missense variants which were predicted as likely pathogenic by at least 53'9% (seven of thirteen) of the bioinformatics tools.

| Gene           | Chr: position | Amino acid change | Nucleotide change | Zygoty | SIFT  |            | Polyphen-2 |                   | MutationTaster |                 | PhyloP | CADD  | Grantham Score | Phast Cons | GERP++ | MutationAssessor |                | LRT         | FATHMM      | RadialSVM   | LR          | ClinVar   | N |
|----------------|---------------|-------------------|-------------------|--------|-------|------------|------------|-------------------|----------------|-----------------|--------|-------|----------------|------------|--------|------------------|----------------|-------------|-------------|-------------|-------------|-----------|---|
|                |               |                   |                   |        | Score | Prediction | Score      | Prediction        | Score          | Prediction      |        |       |                |            |        | Score            | Prediction     |             |             |             |             |           |   |
| <i>ATP13A2</i> | 1:17328585    | p.G2175           | c.G649A           | Hetero | 0     | Damaging   | 1          | Probably damaging | 1              | Disease causing | 5.577  | 22.8  | 56             | 0.956      | 4.89   | 3.41             | Medium         | Deleterious | Deleterious | Deleterious | Deleterious | VOUS      | 1 |
| <i>ATP13A2</i> | 1:17318246    | p.R745H           | c.G2234A          | Hetero | 0.03  | Damaging   | 1          | Probably damaging | 1              | Disease causing | 7.265  | 21.1  | 29             | 1          | 4.93   | 2.315            | Medium         | Deleterious | Tolerated   | Deleterious | Deleterious | ND        | 1 |
| <i>DNAJC6</i>  | 1:65831737    | p.S134F           | c.C401T           | Hetero | 0.09  | Tolerated  | 1          | Probably damaging | 1              | Disease causing | 7.247  | 29.1  | 155            | 1          | 5.51   | 2.62             | Medium         | Deleterious | Deleterious | Deleterious | Deleterious | ND        | 1 |
| <i>DNAJC6</i>  | 1:65854097    | p.K398E           | c.A1192G          | Hetero | 0     | Damaging   | 0.992      | Probably damaging | 1              | Disease causing | 6.548  | 20.4  | 56             | 1          | 4.9    | 2.44             | Medium         | Deleterious | Deleterious | Deleterious | Deleterious | ND        | 1 |
| <i>DNAJC6</i>  | 1:65877062    | p.V922M           | c.G2764A          | Hetero | 0     | Damaging   | 1          | Probably damaging | 1              | Disease causing | 9.657  | 29.6  | 21             | 1          | 5.03   | 3.03             | Medium         | Deleterious | Tolerated   | Tolerated   | Tolerated   | ND        | 1 |
| <i>EIF4G1</i>  | 3:184040997   | p.G693C           | c.G2077T          | Hetero | 0.05  | Damaging   | 0.999      | Probably damaging | 1              | Disease causing | 0.872  | 18.54 | 159            | 1          | 5.16   | 0.895            | Low            | Deleterious | Tolerated   | Tolerated   | Tolerated   | ND        | 1 |
| <i>EIF4G1</i>  | 3:184045661   | p.L1282H          | c.T3845A          | Hetero | 0.56  | Tolerated  | 1          | Probably damaging | 1              | Disease causing | 7.698  | 31    | 99             | 1          | 6.17   | 1.74             | Low            | Deleterious | Tolerated   | Tolerated   | Tolerated   | ND        | 2 |
| <i>EIF4G1</i>  | 3:184046529   | p.M1362T          | c.T4085C          | Hetero | 0     | Damaging   | 0.998      | Probably damaging | 1              | Disease causing | 7.698  | 18.64 | 81             | 1          | 4.54   | 2.48             | Medium         | Deleterious | Tolerated   | Tolerated   | Tolerated   | ND        | 1 |
| <i>GBA</i>     | 1:155207997   | p.V230G           | c.T689G           | Hetero | 0.25  | Tolerated  | 0.011      | Benign            | 1              | Disease causing | 5.309  | 4.868 | 109            | 0.987      | 2.5    | 0.77             | Non-functional | Neutral     | Deleterious | Deleterious | Deleterious | ND        | 1 |
| <i>GBA</i>     | 1:155206220   | p.I347T           | c.T1040C          | Hetero | 0.11  | Tolerated  | 0.937      | Possibly damaging | 1              | Disease causing | 8.274  | 17.27 | 89             | 0.984      | 3.67   | 1.365            | Low            | Deleterious | Deleterious | Deleterious | Deleterious | ND        | 1 |
| <i>GBA</i>     | 1:155206167   | p.E365K           | c.G1093A          | Hetero | 0.43  | Tolerated  | 0.03       | Benign            | 0              | Disease causing | 0.838  | 11.06 | 56             | 0.845      | 3.67   | 1.01             | Low            | Neutral     | Deleterious | Deleterious | Deleterious | VOUS / RF | 1 |
| <i>GBA</i>     | 1:155206052   | p.S403N           | c.G1208A          | Hetero | 0.1   | Tolerated  | 0.996      | Probably damaging | 0.554          | Polymorphism    | 5.361  | 20.3  | 46             | 1          | 3.57   | 2.045            | Medium         | Deleterious | Deleterious | Deleterious | Deleterious | P         | 1 |
| <i>GIGYF2</i>  | 2:233712207   | p.R1225C          | c.C3673T          | Hetero | 0     | Damaging   | 0.946      | Possibly damaging | 1              | Disease causing | 1.725  | 17.35 | 180            | 0.997      | 5.4    | 0.625            | Non-functional | Deleterious | Tolerated   | Tolerated   | Tolerated   | ND        | 1 |
| <i>LRRK2</i>   | 12:40704236   | p.R1441C          | c.C4321T          | Hetero | 0.14  | Tolerated  | 1          | Probably damaging | 1              | Disease causing | 3.654  | 23.5  | 180            | 0.082      | 4.74   | 1.97             | Medium         | Deleterious | Tolerated   | Deleterious | Deleterious | P         | 1 |
| <i>LRRK2</i>   | 12:40713845   | p.R1628H          | c.G4883A          | Hetero | 0.22  | Tolerated  | 1          | Probably damaging | 1              | Disease causing | 8.853  | 33    | 29             | 1          | 5.54   | 1.43             | Low            | Deleterious | Tolerated   | Tolerated   | Tolerated   | VOUS      | 2 |
| <i>LRRK2</i>   | 12:40734202   | p.G2019S          | c.G6055A          | Hetero | 0     | Damaging   | 1          | Probably damaging | 1              | Disease causing | 9.527  | 36    | 56             | 0.966      | 5.69   | 3.765            | High           | Deleterious | Deleterious | Deleterious | Deleterious | P         | 5 |
| <i>PARK2</i>   | 6:162864434   | p.K27X            | c.A79T            | Homo   | 1     | Tolerated  | .          | .                 | 1              | Disease causing | 6.231  | 38    | NA             | 1          | 5.63   | .                | .              | Deleterious | .           | .           | .           | ND        | 1 |
| <i>PARK2</i>   | 6:162864388   | p.R42H            | c.G125A           | Hetero | 0.15  | Tolerated  | 0.726      | Possibly damaging | 1              | Disease causing | 0.727  | 21.2  | 103.29         | 1          | 4.74   | 3.47             | Medium         | Deleterious | Tolerated   | Deleterious | Deleterious | VOUS      | 1 |
| <i>PARK2</i>   | 6:162394349   | p.T240M           | c.C719T           | Hetero | 0.05  | Damaging   | 0.991      | Probably damaging | 0.983          | Polymorphism    | 6.594  | 16.31 | 81             | 0.299      | 5.14   | 1.78             | Low            | Neutral     | Deleterious | Deleterious | Deleterious | P         | 1 |
| <i>PARK2</i>   | 6:162206909   | p.R256C           | c.C766T           | Hetero | 0.02  | Damaging   | 1          | Probably damaging | 0.999          | Disease causing | 8.289  | 26.9  | 180            | 0.06       | 5.75   | 2.3              | Medium         | Deleterious | Deleterious | Deleterious | Deleterious | ND        | 1 |
| <i>PARK2</i>   | 6:161781200   | p.R402H           | c.G1205A          | Hetero | 0.01  | Damaging   | 1          | Probably damaging | 1              | Disease causing | 5.469  | 21.2  | 29             | 0.686      | 4.89   | 2.56             | Medium         | Deleterious | Deleterious | Deleterious | Deleterious | ND        | 1 |
| <i>PARK2</i>   | 6:161771195   | p.W445X           | c.G1334A          | Hetero | 1     | Tolerated  | .          | .                 | 1              | Disease causing | 5.476  | 34    | NA             | 1          | 5.27   | .                | .              | Deleterious | .           | .           | .           | ND        | 1 |
| <i>PINK1</i>   | 1:20972133    | p.L347P           | c.T1040C          | Homo   | 0     | Damaging   | 1          | Probably damaging | 1              | Disease causing | 6.959  | 15.71 | 98             | 0.775      | 4.9    | 4.13             | High           | Deleterious | Tolerated   | Deleterious | Deleterious | P         | 1 |
| <i>PLA2G6</i>  | 22:38509628   | p.V690I           | c.G2068A          | Hetero | 0     | Damaging   | 1          | Probably damaging | 1              | Disease causing | 4      | 17.29 | 29             | 0.962      | 4.36   | 1.85             | Low            | Deleterious | Tolerated   | Deleterious | Deleterious | VOUS      | 1 |
| <i>PLA2G6</i>  | 22:38508553   | p.R745Q           | c.G2234A          | Hetero | 0     | Damaging   | 1          | Probably damaging | 1              | Disease causing | 6.995  | 28.7  | 43             | 1          | 4.54   | 2.64             | Medium         | Deleterious | Tolerated   | Deleterious | Deleterious | ND        | 1 |
| <i>SMPD1</i>   | 11:6414486    | p.R378C           | c.C1132T          | Hetero | 0     | Damaging   | 1          | Probably damaging | 1              | Disease causing | 4.64   | 22.4  | 180            | 1          | 5.41   | 3.785            | High           | Deleterious | Deleterious | Deleterious | Deleterious | ND        | 1 |
| <i>SMPD1</i>   | 11:6415566    | p.R542Q           | c.G1625A          | Hetero | 0.14  | Tolerated  | 0.981      | Probably damaging | 0.75           | Disease causing | 1.982  | 13.8  | 43             | 0.919      | 2.94   | 2.255            | Medium         | Neutral     | Deleterious | Deleterious | Tolerated   | VOUS      | 1 |
| <i>SYNJ1</i>   | 21:34060664   | p.R307H           | c.G920A           | Hetero | 0.64  | Tolerated  | 1          | Probably damaging | 1              | Disease causing | 7.193  | 18.67 | 29             | 1          | 6.16   | 1.145            | Low            | Deleterious | Tolerated   | Tolerated   | Tolerated   | VOUS      | 1 |
| <i>SYNJ1</i>   | 21:34060625   | p.A320V           | c.C959T           | Hetero | 0.02  | Damaging   | 1          | Probably damaging | 1              | Disease causing | 9.061  | 36    | 64             | 1          | 6.16   | 2.11             | Medium         | Deleterious | Tolerated   | Tolerated   | Tolerated   | VOUS      | 1 |
| <i>SYNJ1</i>   | 21:34003786   | p.G1453E          | c.G4358A          | Hetero | 0.01  | Damaging   | 0.989      | Probably damaging | 1              | Disease causing | 4.989  | 22.9  | NA             | 0.988      | 5.13   | 1.845            | Low            | Deleterious | Tolerated   | Tolerated   | Tolerated   | B         | 4 |
| <i>VP535</i>   | 16:46717460   | p.Q21L            | c.A62T            | Hetero | 0.32  | Tolerated  | 0          | Benign            | 1              | Disease causing | 7.972  | 15.92 | 113            | 1          | 5.42   | 0.64             | Non-functional | Deleterious | Tolerated   | Tolerated   | Tolerated   | ND        | 2 |
| <i>VP535</i>   | 16:46696262   | p.A654S           | c.G1960T          | Hetero | 0.08  | Tolerated  | 0.999      | Probably damaging | 1              | Disease causing | 7.818  | 34    | 99             | 1          | 5.49   | 2.87             | Medium         | Deleterious | Tolerated   | Deleterious | Deleterious | ND        | 1 |

VOUS: Variant of uncertain significance; P: Pathogenic; B: Benign; N: number of carriers; ND: No data.
