# Supplementary material for: A genetic analysis of a Spanish population with early onset Parkinson’s disease
Source: PubMed Central journal article supplement (PMC7462269; doi:10.1371/journal.pone.0238098), 2020-09-01
Supplement: pone.0238098.s004.pdf [file pone.0238098.s004.pdf]

Table S3. Very interesting variants to be prioritized found in our PD-population from central Spain

| Gene (MI)              | Transcript     | Exon (E) / Intron (I) | Nucleotide change | Amino acid change | dbSNP ID     | Carriers (n=117) |     | maf       |                         |          | Previously Reported | Effect | ACMG classification (AC) |                               |
|------------------------|----------------|-----------------------|-------------------|-------------------|--------------|------------------|-----|-----------|-------------------------|----------|---------------------|--------|--------------------------|-------------------------------|
|                        |                |                       |                   |                   |              | Het              | Hom | Our study | GO-ESP <sup>&amp;</sup> | ExAc*    |                     |        | Verdict                  | Rules                         |
| <b>ATP13A2 (AR-RF)</b> | NM_022089.3    | E8                    | c.649G>A          | p.Gly217Ser       | rs199961048  | 1                | 0   | 4.27e-3   | ND                      | 1.62e-05 | Yes                 | MS     | VOUS                     | PM2, PP3, BP1                 |
|                        |                | E20                   | c.2234G>A         | p.Arg745His       | rs140455242  | 1                | 0   | 4.27e-3   | 1.16e-04                | 1.5e-05  | Yes                 | MS     | VOUS                     | PM2, PP3, BP1                 |
|                        |                | I24                   | c.2762+21T>C      | -                 | rs560897844  | 1                | 0   | 4.27e-3   | ND                      | 1.5e-05  | Yes                 | SR     | VOUS                     | PM2, PP3, BP4                 |
| <b>DNAJC6 (AR)</b>     | NM_001256864   | E4                    | c.401C>T          | p.Ser134Phe       | rs1226853857 | 1                | 0   | 4.27e-3   | ND                      | ND       | Yes                 | MS     | VOUS                     | PM2, PP3, BP1                 |
|                        |                | E9                    | c.1192A>G         | p.Lys398Glu       | -            | 1                | 0   | 4.27e-3   | ND                      | ND       | No                  | MS     | VOUS                     | PM2, PP3, BP1                 |
|                        |                | E18                   | c.2764G>A         | p.Val922Met       | -            | 1                | 0   | 4.27e-3   | ND                      | ND       | No                  | MS     | VOUS                     | PM2, PP3, BP1                 |
| <b>EIF4G1 (AD)</b>     | NM_001194946   | E15                   | c.2077G>T         | p.Gly693Cys       | rs112019125  | 1                | 0   | 4.27e-3   | ND                      | 9e-05    | Yes                 | MS/SR  | LB                       | PP3, BS1, BP1                 |
|                        |                | E28                   | c.4085T>C         | p.Met1362Thr      | rs144059151  | 1                | 0   | 4.27e-3   | 8.14e-04                | 5.8e-04  | Yes                 | MS     | LB                       | PP3, BS1, BP1                 |
| <b>GBA (AD-RF)</b>     | NM_001005741.2 | E9                    | c.1040T>C         | p.Ile347Thr       | -            | 1                | 0   | 4.27e-3   | ND                      | ND       | No                  | MS     | LP                       | PM1, PM2, PP2, PP3            |
|                        |                | E9                    | c.1208G>A         | p.Ser403Asn       | -            | 1                | 0   | 4.27e-3   | ND                      | ND       | No                  | MS     | LP                       | PM1, PM2, PM5, PP2, PP3       |
| <b>GIGYF2 (AD-S)</b>   | NM_001103147   | E29                   | c.3673C>T         | p.Arg1225Cys      | rs149440697  | 1                | 0   | 4.27e-3   | 1.16e-04                | 4.47e-05 | Yes                 | MS     | VOUS                     | PP3, BS1                      |
| <b>LRRK2 (AD)</b>      | NM_198578.3    | E30                   | c.4229C>T         | p.Thr1410Met      | rs72546327   | 1                | 0   | 4.27e-3   | 0                       | 1.2e-04  | Yes                 | MS     | B                        | PM1, PP3, BS1, BS2, BP1, BP6  |
|                        |                | E31                   | c.4321C>T         | p.Arg1441Cys      | rs33939927   | 1                | 0   | 4.27e-3   | ND                      | 1.5e-05  | Yes                 | MS     | LP                       | PM1, PM2, PM5, PP3, PP5, BP1  |
|                        |                | I31                   | c.4536+3A>G       | -                 | rs41286476   | 1                | 0   | 4.27e-3   | 5.81e-04                | 4.38e-04 | Yes                 | SR     | VOUS                     | PP3, PP5, BS2                 |
|                        |                | E41                   | c.6055G>A         | p.Gly2019Ser      | rs34637584   | 5                | 0   | 0.022     | 5.8e-04                 | 6.29e-04 | Yes                 | MS     | P                        | PS1, PS3, PS4, PM1, PP3, BS2, |
| <b>PARK2 (AR)</b>      | NM_004562.2    | 2                     | c.79A>T           | p.Lys27Stop       | -            | 0                | 1   | 8.55e-3   | ND                      | ND       | No                  | SG     | P                        | PVS1, PM1, PM2, PP3           |
|                        |                | 2                     | c.125G>C          | p.Arg42Pro        | rs368134308  | 1                | 0   | 4.27e-3   | 1.16e-04                | 4.5e-05  | Yes                 | MS     | LP                       | PM1, PM2, PP2, PP3, PP5       |
|                        |                | 2                     | c.155delA         | p.Asn52Metfs      | rs754809877  | 3                | 7   | 0.073     | 6.06e-04                | 3.15e-04 | Yes                 | FS     | P                        | PVS1, PM1, PP3, PP5           |
|                        |                | 6                     | c.719C>T          | p.Thr240Met       | rs137853054  | 1                | 0   | 4.27e-3   | 2.33e-04                | 1.35e-04 | Yes                 | MS     | LP                       | PM1, PM5, PP2, PP3, PP5       |
|                        |                | 7                     | c.766C>T          | p.Arg256Cys       | rs150562946  | 1                | 0   | 4.27e-3   | 4.65e-04                | 5.14e-04 | Yes                 | MS     | VOUS                     | PM1, PP2, PP3, PP5            |
|                        |                | 11                    | c.1205G>A         | p.Arg402His       | rs766915327  | 1                | 0   | 4.27e-3   | ND                      | 0        | Yes                 | MS     | LP                       | PM1, PM2, PM5, PP2, PP3       |
|                        |                | 12                    | c.1334G>A         | p.Trp445Stop      | rs961239925  | 1                | 0   | 4.27e-3   | ND                      | ND       | Yes                 | SG     | P                        | PVS1, PM1, PM2, PP3           |
|                        |                | 3                     | Del               | Del               | -            | 0                | 1   | 8.55e-3   | -                       | -        | -                   | DEE    | P                        | PVS1, PS3                     |

|                    |             |            |           |             |              |   |   |         |          |          |     |         |      |                         |
|--------------------|-------------|------------|-----------|-------------|--------------|---|---|---------|----------|----------|-----|---------|------|-------------------------|
|                    |             | 4          | Del       | Del         | -            | 1 | 0 | 4.27e-3 | -        | -        | -   | DEE     | LP   | PVS1, PM3               |
|                    |             | 3, 4, 5, 6 | Del       | Del         | -            | 1 | 2 | 0.021   | -        | -        | -   | DEE     | LP   | PVS1, PM3               |
|                    |             | 7          | Del       | Del         | -            | 4 | 0 | 0.017   | -        | -        | -   | DEE     | LP   | PVS1, PM3               |
| <b>PINK1 (AR)</b>  | NM_032409.2 | 5          | c.1040T>C | p.Leu347Pro | rs28940285   | 0 | 1 | 8.55e-3 | ND       | 0        | Yes | MS      | LP   | PM1, PM2, PP3, PP5, BP1 |
| <b>PLA2G6 (AR)</b> | NM_003560.2 | E15        | c.2068G>A | p.Val690Ile | rs141777179  | 1 | 0 | 4.27e-3 | 8.14e-04 | 9.17e-04 | Yes | MS      | VOUS | PP2, PP3, BS1           |
|                    |             | E16        | c.2234G>A | p.R745Q     | rs368514303  | 1 | 0 | 4.27e-3 | 1.2e-04  | 0        | Yes | MS      | LP   | PM1, PM5, PP2, PP3, BS1 |
| <b>SMPD1 (RF)</b>  | NM_000543.4 | E2         | c.441G>A  | p.V147V     | rs148944108  | 2 | 0 | 8.55e-3 | 0        | 1.67e-04 | Yes | SN / SR | VOUS | PM1, PP3, BS1           |
|                    |             | E3         | c.1132C>T | p.R378C     | rs369088417  | 1 | 0 | 4.27e-3 | 0        | 0        | Yes | MS      | LP   | PM1, PM2, PP2, PP3      |
| <b>SYNJ1 (AR)</b>  | NM_003895.3 | E7         | c.959C>T  | p.A320V     | rs1046699971 | 1 | 0 | 4.27e-3 | ND       | ND       | Yes | MS      | VOUS | PM2, PP3, BP1           |
| <b>VPS35 (AD)</b>  | NM_018206.5 | E15        | c.1960G>T | p.A654S     | -            | 1 | 0 | 4.27e-3 | No       | ND       | No  | MS      | VOUS | PM2, PP3, BP1           |

MI: Mode of Inheritance; AD: Autosomal dominant; AR: Autosomal recessive; S: Susceptibility; RF: Risk factor; N: Number of carriers; Het: Heterozygosity; Hom: Homozygosity; SG: Stop gain; MS: Missense; FS: Frameshift; DEE: Deletion of the entire exon; SR: Splice region; SN: Synonymous; MAF: Minor allele frequency; &: European Americans; \*: Non-Finnish European; AC: Automated criteria; VOUS: Variant of uncertain significance; LP: Likely Pathogenic; P: Pathogenic; LB: Likely Benign; B: Benign.
