# Supplementary material for: A genetic analysis of a Spanish population with early onset Parkinson’s disease
Source: PubMed Central journal article supplement (PMC7462269; doi:10.1371/journal.pone.0238098), 2020-09-01
Supplement: pone.0238098.s005.pdf [file pone.0238098.s005.pdf]

online only

**Table S4. Variants putatively affecting splicing**

| Gene    | Intron / Exon | Chr position | Nucleotide change | Strand | Splice Site | Distance to Splice Site | ID           | N  | Frequency    |          | SSF   |           | MaxEnt |           | NNSplice  |           | GeneSplicer |           | HSF   |           | dnCSNV scores |       | Putative consequence                                               |
|---------|---------------|--------------|-------------------|--------|-------------|-------------------------|--------------|----|--------------|----------|-------|-----------|--------|-----------|-----------|-----------|-------------|-----------|-------|-----------|---------------|-------|--------------------------------------------------------------------|
|         |               |              |                   |        |             |                         |              |    | 1000G EUR    | Affected | Score | variation | Score  | variation | Score     | variation | Score       | variation | Score | variation | ada           | rf    |                                                                    |
| ATP13A2 | E10           | 1: 17326767  | c.881G>A          | -      | 5'          | 27                      | rs56367069*  | 5  | 0.018        | 0.0214   | 79.69 | (+12.7%)  | 6.46   | (+55.9%)  | 0.79      | appear    | 6.76        | (+142%)   | 87.86 | (+5.9%)   | -             | -     | appear a putative new 5' donor site in c.882                       |
|         | I24           | 1: 17314796  | c.2762+21T>C      | -      | 5'          | 19                      | rs560897844* | 1  | 0.0002 (all) | 0.0043   | 81.66 | (+5.3%)   | 8.48   | (+25.7%)  | 0.54      | appear    | 5.18        | (+146.3%) | 92.05 | (+2.2%)   | -             | -     | stronger cryptic 5' donor site                                     |
|         | I26           | 1: 17313454  | c.3084-3C>T       | -      | 3'          | 1                       | rs7531163    | 68 | 0.25         | 0.325    | 76.52 | (-7.5%)   | 9.90   | (+6.5%)   | 0.96      | (+4.4%)   | 13.19       | (+14.3%)  | 84.49 | (-8.3%)   | 0.0011        | 0.1   | weaker 3' acceptor site                                            |
|         | I27           | 1: 17313283  | c.3235+17G>A      | -      | 5'          | 15                      | rs56146840   | 5  | 0.019        | 0.0214   | 70.14 | appear    | 3.78   | appear    | -         | -         | 1.96        | appear    | 83.47 | appear    | -             | -     | appear a new 3' acceptor site in c.3235+18                         |
| DNAJC6  | E9            | 1: 65854097  | c.1192A>G         | +      | 5'          | 2                       | -            | 1  | -            | 0.0043   | 78.90 | (-10.2)   | 10.15  | (+0.7%)   | 0.99      | (-0.2%)   | 4.94        | (+21.9%)  | 84.56 | (-5.4%)   | 0.9934        | 0.96  | weaker 5' donor site in c.1193                                     |
| EIF4G1  | I11           | 3: 184040606 | c.1796-3C>T       | +      | 3'          | 1                       | rs190378563  | 1  | 0.001        | 0.0043   | 87.71 | (-6.6%)   | 11.84  | (-12.84%) | 0.99      | (+0.2%)   | 10.07       | (-12.9%)  | 87.91 | (-8.0%)   | 0.0018        | 0.196 | weaker 3' acceptor site                                            |
|         | E13           | 3: 184040997 | c.2056G>T         | +      | 5'          | 33                      | rs112019125* | 1  | -            | 0.0043   | 80.14 | appear    | 5.28   | appear    | 0.92      | appear    | 2.52        | appear    | 87.15 | appear    | -             | -     | appear a putative new 5' donor site in c.2054                      |
|         | I29           | 3: 184049399 | c.4398+5G>A       | +      | 5'          | 3                       | rs16858676   | 1  | 0.014 (all)  | 0.0043   | 74.71 | (-14.0%)  | 6.04   | (-37.4%)  | 0.88      | (-9.3%)   | 6.17        | (-37.3%)  | 77.73 | (-13.5%)  | 0.9556        | 0.656 | weaker 5' donor site                                               |
| GIGYF2  | I4            | 2: 233568203 | c.-44+4A>G        | +      | 5'          | 2                       | rs746723892  | 1  | -            | 0.0043   | 89.92 | (-10.1%)  | 10.28  | (-5.3%)   | 0.96      | (-3.4%)   | 5.73%       | (-16.2%)  | 91.66 | (-8.3%)   | 0.3339        | 0.44  | weaker 5' donor site                                               |
| LRRK2   | I31           | 12: 40704454 | c.4536+3A>G       | +      | 5'          | 1                       | rs41286476   | 1  | -            | 0.0043   | 77.31 | (-5.3%)   | 5.19   | (-41.8%)  | desappear | -         | desappear   | -         | 86.21 | (-11.4%)  | 0.9712        | 0.86  | weaker 5' donor site                                               |
| SMPD1   | E2            | 11: 6412736  | c.441G>A          | +      | 3'          | 120                     | rs148944108* | 2  | 0.002        | 0.0086   | 81.75 | (+5.6%)   | 8.98   | (+100.6%) | 0.75      | appear    | 4.85        | appear    | 87.50 | (+1.3%)   | -             | -     | appear a new 5' donor site in c.438                                |
| SYNJ1   | I1            | 21: 34100124 | c.-23+24G>A       | -      | 5'          | 22                      | rs755252765  | 2  | -            | 0.0086   | 70.57 | appear    | 5.10   | (+79.3%)  | -         | -         | 4.73        | (+60.9%)  | 82.29 | (+1.0%)   | -             | -     | appear a putative new 5' donor site (referred to isoforms 3 and 4) |
| UCHL1   | I2            | 4: 41259149  | c.45+6T>C         | +      | 5'          | 4                       | rs11556273   | 21 | 0.09         | 0.098    | 77.42 | (-6.9%)   | 5.89   | (-29.9%)  | 0.90      | (-8.3%)   | 4.22        | (-34.4%)  | 85.13 | (-2.5%)   | 0.8166        | 0.724 | weaker 5' donor site                                               |

Chr: chromosome; E: Exon; I: Intron; N: number of carriers; SSF: Splicing Sequences Finder; MaxEnt: Maximum Entropy Scan; NNSplice: Splice site prediction by Neural Network; HSF: Human Splicing Finder; ADA: adaptive boosting, RF: random forest; \*: Predicted as likely pathogenic by all 5 tools with high scores.
